# Supplementary material for: Molecular analysis of a male breast cancer patient with prolonged stable disease under mTOR/PI3K inhibitors BEZ235/everolimus
Source: PubMed Central journal article supplement — Cold Spring Harb Mol Case Stud. 2016 Mar;2(2):a000620. doi: 10.1101/mcs.a000620 (PMC4849849; doi:10.1101/mcs.a000620), 2016-03

# Supplemental Figure 1

A

Pre-treatment

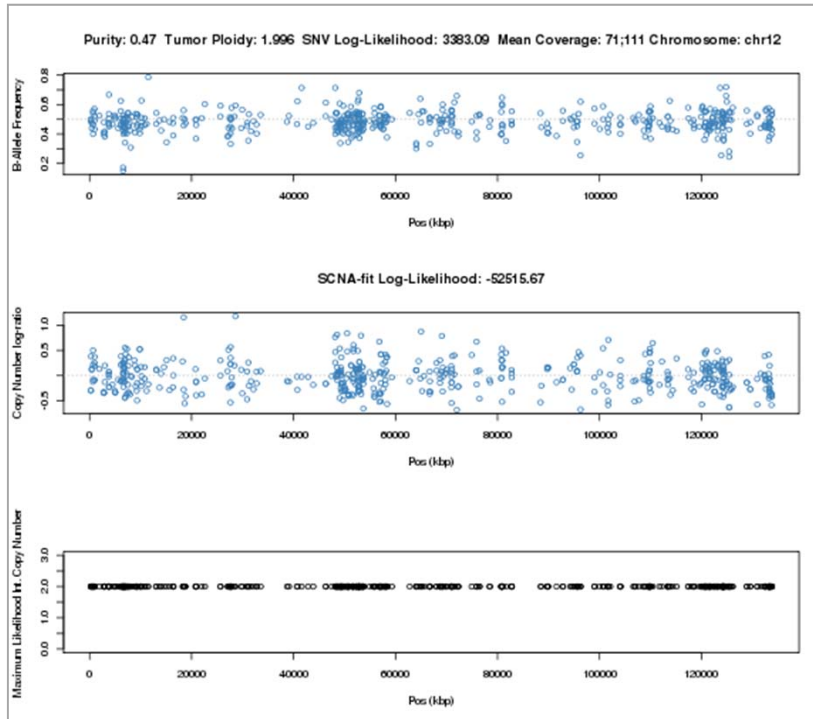

B

Post-progression

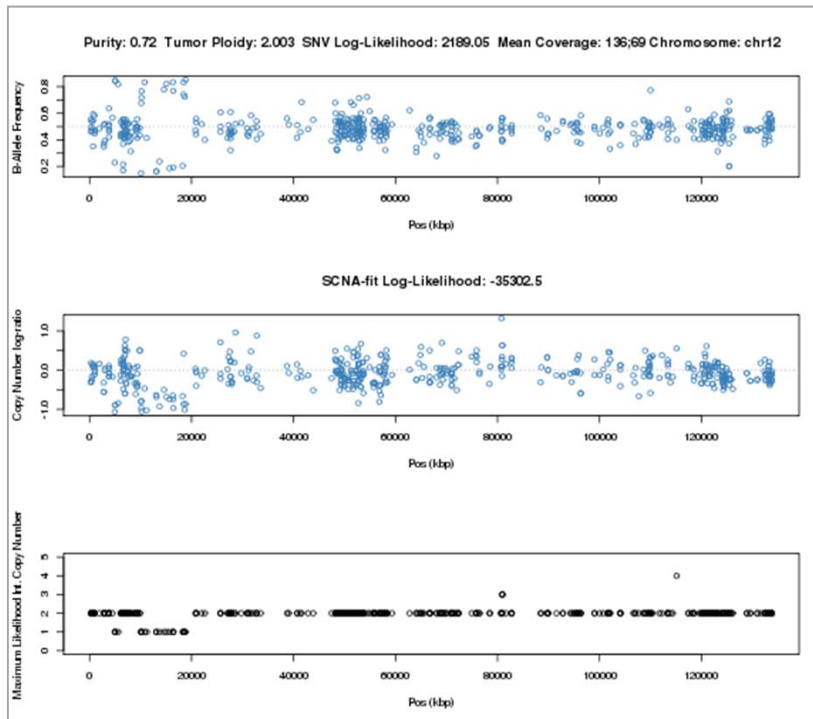

**Supplemental Figure 1: LOH at chromosome 12p in post-treatment sample.** A). Germline allelic fractions (top), copy numbers (log<sub>2</sub> ratio, normalized with matched blood sample, middle) and maximum likelihood tumor copy numbers (bottom) for all heterozygous germline variants in the pre-treatment sample on chromosome 12. Chromosome 12 is diploid with no evidence of LOH. B) The same plot for the post treatment sample. LOH at chr12:10,074,776-18,800,953 supported by both copy number and germline allelic fractions. In the LOH region, germline allelic fractions of about 0.22 represent variants lost in tumor and which are present in the normal contamination only; variants with allelic fraction of about 0.78 are present in tumor and normal.

# Supplemental Table 1

| Block            | KI-67      | pMAPK |     |    |         | pEGFR |    |    |         | pMEK |    |    |         |
|------------------|------------|-------|-----|----|---------|-------|----|----|---------|------|----|----|---------|
|                  | % positive | 1+    | 2+  | 3+ | H-score | 1+    | 2+ | 3+ | H-score | 1+   | 2+ | 3+ | H-score |
| Pre-treatment    | 13%        | 20%   | 5%  | 0% | 35      | 0%    | 0% | 0% | 0       | 50%  | 0% | 0% | 50      |
| Post-progression | 16%        | 10%   | 20% | 0% | 50      | 30%   | 0% | 0% | 30      | 70%  | 0% | 0% | 70      |

| Block ID#        | pAKT |    |    |         | pS6-235/236 |    |    |         | pS6-240/244 |     |     |         |
|------------------|------|----|----|---------|-------------|----|----|---------|-------------|-----|-----|---------|
|                  | 1+   | 2+ | 3+ | H-score | 1+          | 2+ | 3+ | H-score | 1+          | 2+  | 3+  | H-score |
| Pre-treatment    | 0%   | 0% | 0% | 0       | 40%         | 0% | 0% | 40      | 20%         | 30% | 20% | 140     |
| Post-progression | 5%   | 5% | 0% | 15      | 10%         | 0% | 0% | 10      | 30%         | 10% | 30% | 140     |

| Block ID#        | PTEN |     |    |         | ER       |            | PR       |            |
|------------------|------|-----|----|---------|----------|------------|----------|------------|
|                  | 1+   | 2+  | 3+ | H-score | Status   | AQUA Score | Status   | AQUA Score |
| Pre-treatment    | 70%  | 30% | 0% | 130     | Positive | 31         | Positive | 271        |
| Post-progression | 80%  | 0%  | 0% | 80      | Positive | 312        | Positive | 1305       |

Supplemental Table 1. Immunohistochemical analysis of tumor samples.

# Supplemental Figure 2

Pre-treatment

Post-progression

ER

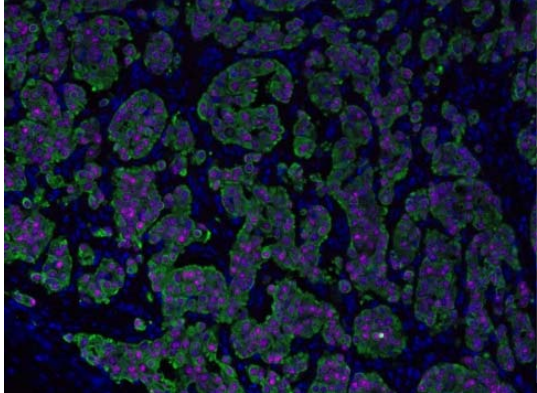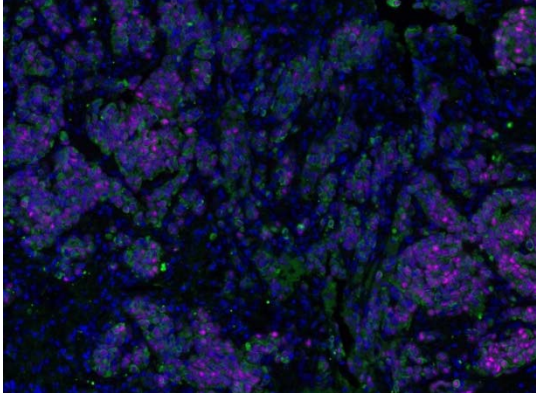

PR

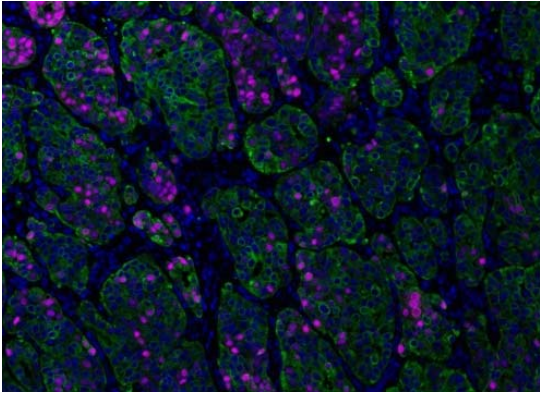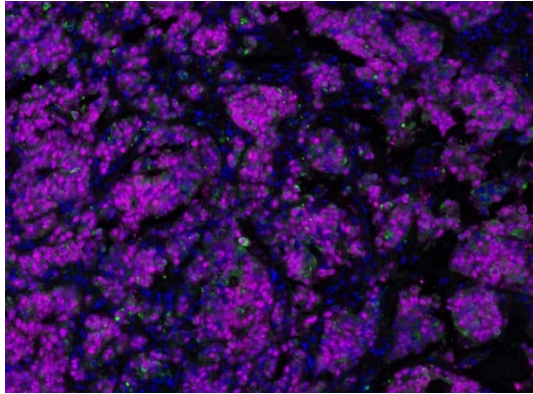

HER2

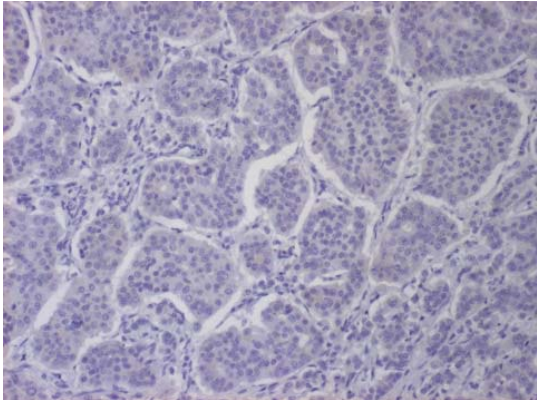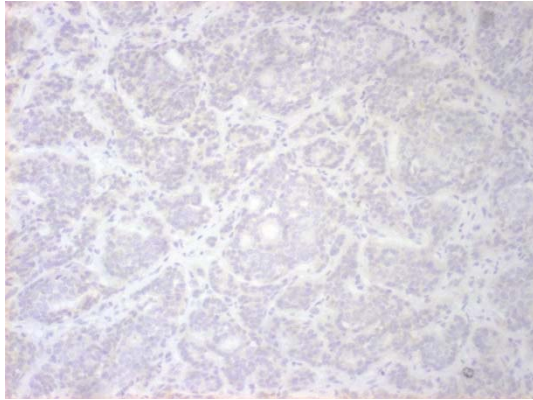

H&E

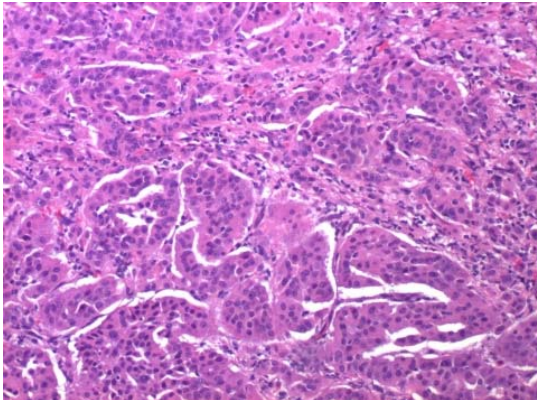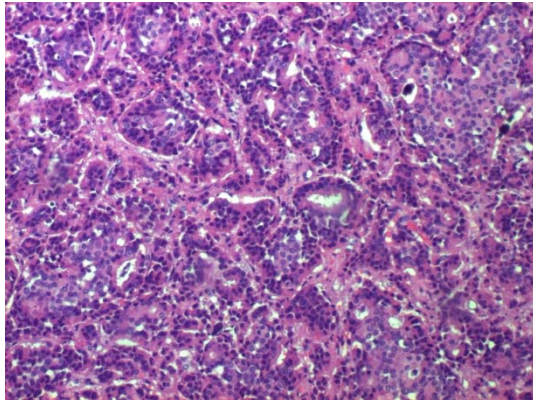

Supplement: supp_mcs.a000620_Supplemental_Data.pdf [file supp_mcs.a000620_Supplemental_Data.pdf]
